# Supplementary material for: Patterns of Cis Regulatory Variation in Diverse Human Populations
Source: PubMed Central journal article supplement (PMC3330104; doi:10.1371/journal.pgen.1002639), 2012-04-19
Supplement: pgen.1002639.s012.pdf [file pgen.1002639.s012.pdf]

Table S1. Summary of the distribution of  $V_{ST}$  values per probe for all pairwise population comparisons, including the number of genes with  $V_{ST}$  greater than 0.2.

| <b>Population Pair</b> | <b>Median</b> | <b>Mean</b> | <b>Maximum</b> | <b>Number of genes <math>V_{ST}</math> &gt; 0.2</b> |
|------------------------|---------------|-------------|----------------|-----------------------------------------------------|
| CEU-CHB                | 0.013         | 0.040       | 0.693          | 893                                                 |
| CEU-GIH                | 0.012         | 0.037       | 0.551          | 721                                                 |
| CEU-JPT                | 0.012         | 0.036       | 0.614          | 624                                                 |
| CEU-LWK                | 0.011         | 0.034       | 0.632          | 591                                                 |
| CEU-MEX                | 0.011         | 0.042       | 0.628          | 1081                                                |
| CEU-MKK                | 0.040         | 0.079       | 0.702          | 2647                                                |
| CEU-YRI                | 0.007         | 0.021       | 0.456          | 146                                                 |
| CHB-GIH                | 0.020         | 0.056       | 0.675          | 1727                                                |
| CHB-JPT                | 0.005         | 0.017       | 0.238          | 13                                                  |
| CHB-LWK                | 0.030         | 0.079       | 0.701          | 3035                                                |
| CHB-MEX                | 0.011         | 0.042       | 0.504          | 1155                                                |
| CHB-MKK                | 0.054         | 0.102       | 0.777          | 4031                                                |
| CHB-YRI                | 0.021         | 0.044       | 0.624          | 806                                                 |
| GIH-JPT                | 0.017         | 0.049       | 0.569          | 1302                                                |
| GIH-LWK                | 0.028         | 0.075       | 0.730          | 2638                                                |
| GIH-MEX                | 0.017         | 0.057       | 0.634          | 1955                                                |
| GIH-MKK                | 0.029         | 0.060       | 0.499          | 1679                                                |
| GIH-YRI                | 0.013         | 0.035       | 0.554          | 578                                                 |
| JPT-LWK                | 0.025         | 0.076       | 0.651          | 2947                                                |
| JPT-MEX                | 0.009         | 0.034       | 0.508          | 535                                                 |
| JPT-MKK                | 0.034         | 0.086       | 0.782          | 3384                                                |
| JPT-YRI                | 0.011         | 0.035       | 0.579          | 623                                                 |
| LWK-MEX                | 0.021         | 0.079       | 0.765          | 2979                                                |
| LWK-MKK                | 0.040         | 0.090       | 0.741          | 3394                                                |
| LWK-YRI                | 0.012         | 0.031       | 0.399          | 306                                                 |
| MEX-MKK                | 0.035         | 0.093       | 0.783          | 3820                                                |
| MEX-YRI                | 0.013         | 0.045       | 0.576          | 1196                                                |
| MKK-YRI                | 0.021         | 0.050       | 0.569          | 1183                                                |
