# Supplementary material for: Patterns of Cis Regulatory Variation in Diverse Human Populations
Source: PubMed Central journal article supplement (PMC3330104; doi:10.1371/journal.pgen.1002639), 2012-04-19
Supplement: pgen.1002639.s015.pdf [file pgen.1002639.s015.pdf]

Table S4. Range of Spearman's rho for a) *cis*- associations detected using 'REDUCED' data, and b) Spearman's rho for *cis*- associations detected using normalized and PCA-corrected data.

a)

|                | Permutation threshold |         |         |         |
|----------------|-----------------------|---------|---------|---------|
|                | 0.01                  |         | 0.001   |         |
|                | minimum               | maximum | minimum | maximum |
| <b>CEU</b>     | 0.375                 | 0.903   | 0.405   | 0.903   |
| <b>CHB</b>     | 0.438                 | 0.908   | 0.466   | 0.908   |
| <b>GIH</b>     | 0.426                 | 0.923   | 0.464   | 0.923   |
| <b>JPT</b>     | 0.421                 | 0.92    | 0.465   | 0.92    |
| <b>LWK</b>     | 0.438                 | 0.925   | 0.462   | 0.925   |
| <b>MEX</b>     | 0.536                 | 0.933   | 0.603   | 0.933   |
| <b>MKK</b>     | 0.337                 | 0.896   | 0.366   | 0.896   |
| <b>YRI</b>     | 0.372                 | 0.932   | 0.394   | 0.932   |
| <b>average</b> | 0.418                 | 0.918   | 0.453   | 0.918   |

b)

|                | Permutation threshold |         |         |         |
|----------------|-----------------------|---------|---------|---------|
|                | 0.01                  |         | 0.001   |         |
|                | min rho               | max rho | min rho | max rho |
| <b>CEU</b>     | 0.380                 | 0.891   | 0.411   | 0.891   |
| <b>CHB</b>     | 0.439                 | 0.908   | 0.476   | 0.908   |
| <b>GIH</b>     | 0.434                 | 0.887   | 0.469   | 0.887   |
| <b>JPT</b>     | 0.433                 | 0.919   | 0.458   | 0.919   |
| <b>LWK</b>     | 0.428                 | 0.878   | 0.466   | 0.878   |
| <b>MEX</b>     | 0.572                 | 0.902   | 0.621   | 0.902   |
| <b>MKK</b>     | 0.338                 | 0.857   | 0.358   | 0.857   |
| <b>YRI</b>     | 0.385                 | 0.897   | 0.412   | 0.897   |
| <b>average</b> | 0.426                 | 0.892   | 0.459   | 0.892   |
