# Supplementary material for: Patterns of Cis Regulatory Variation in Diverse Human Populations
Source: PubMed Central journal article supplement (PMC3330104; doi:10.1371/journal.pgen.1002639), 2012-04-19
Supplement: pgen.1002639.s016.pdf [file pgen.1002639.s016.pdf]

Table S5. Overlap of *cis*- associated genes that were detected using: 1) normalized and PCA-corrected gene expression data, and 2) 'REDUCED' data.

|            | permutation threshold |                      |                      |                                 |                                 |                      |                      |                      |                                 |                                 |
|------------|-----------------------|----------------------|----------------------|---------------------------------|---------------------------------|----------------------|----------------------|----------------------|---------------------------------|---------------------------------|
|            | 0.01                  |                      |                      |                                 |                                 | 0.001                |                      |                      |                                 |                                 |
|            | REDUCED <sup>a</sup>  | non-RED <sup>b</sup> | overlap <sup>c</sup> | proportion REDUCED <sup>d</sup> | proportion non-RED <sup>e</sup> | REDUCED <sup>a</sup> | non-RED <sup>b</sup> | overlap <sup>c</sup> | proportion REDUCED <sup>d</sup> | proportion non-RED <sup>e</sup> |
| <b>CEU</b> | 1966                  | 657                  | 491                  | 0.25                            | 0.75                            | 1253                 | 313                  | 278                  | 0.22                            | 0.89                            |
| <b>CHB</b> | 1950                  | 774                  | 594                  | 0.30                            | 0.77                            | 1218                 | 378                  | 340                  | 0.28                            | 0.90                            |
| <b>GIH</b> | 1984                  | 698                  | 514                  | 0.26                            | 0.74                            | 1219                 | 300                  | 277                  | 0.23                            | 0.92                            |
| <b>JPT</b> | 2131                  | 795                  | 623                  | 0.29                            | 0.78                            | 1327                 | 386                  | 351                  | 0.26                            | 0.91                            |
| <b>LWK</b> | 1794                  | 773                  | 527                  | 0.29                            | 0.68                            | 962                  | 311                  | 265                  | 0.28                            | 0.85                            |
| <b>MEX</b> | 1131                  | 472                  | 305                  | 0.27                            | 0.65                            | 528                  | 165                  | 132                  | 0.25                            | 0.80                            |
| <b>MKK</b> | 2562                  | 947                  | 660                  | 0.26                            | 0.70                            | 1528                 | 411                  | 362                  | 0.24                            | 0.88                            |
| <b>YRI</b> | 2415                  | 799                  | 559                  | 0.23                            | 0.70                            | 1439                 | 328                  | 300                  | 0.21                            | 0.91                            |

<sup>a</sup>Gene counts detected from the 'REDUCED' analysis.

<sup>b</sup>Gene counts detected from the normalized and PCA-corrected analysis.

<sup>c</sup>The intersection of the gene sets from 'REDUCED' and normalized and PCA-corrected analyses.

<sup>d</sup>The proportion of genes that were detected in the 'REDUCED' analysis that were also detected in the normalized and PCA-corrected analysis.

<sup>e</sup>The proportion of genes that were detected in the normalized and PCA-corrected analysis that were also detected in the 'REDUCED' analysis.
