# Supplementary material for: Patterns of Cis Regulatory Variation in Diverse Human Populations
Source: PubMed Central journal article supplement (PMC3330104; doi:10.1371/journal.pgen.1002639), 2012-04-19
Supplement: pgen.1002639.s017.pdf [file pgen.1002639.s017.pdf]

Table S6. Number of Ensembl genes with independent *cis*-eQTLs at the 0.01 permutation threshold, as determined by stepwise association model.

| No. of independent <i>cis</i> -<br>eQTLs                 | 0.01 permutation threshold |      |      |      |      |      |      |      |
|----------------------------------------------------------|----------------------------|------|------|------|------|------|------|------|
|                                                          | CEU                        | CHB  | GIH  | JPT  | LWK  | MEX  | MKK  | YRI  |
| 1                                                        | 645                        | 765  | 697  | 788  | 772  | 472  | 940  | 786  |
| 2                                                        | 10                         | 6    | 1    | 6    |      | 0    | 7    | 11   |
| 3                                                        | 2                          | 2    |      |      |      |      |      | 2    |
| 4                                                        |                            | 1    |      | 1    |      |      |      |      |
| 5                                                        |                            |      |      |      | 1    |      |      |      |
| <b>Total</b>                                             | 657                        | 774  | 698  | 795  | 773  | 472  | 947  | 799  |
| <b>genes with <math>\geq 2</math> <i>cis</i>-eQTLs</b>   | 12                         | 9    | 1    | 7    | 1    | 0    | 7    | 13   |
| <b>% genes with <math>\geq 2</math> <i>cis</i>-eQTLs</b> | 1.83                       | 1.16 | 0.14 | 0.88 | 0.13 | 0.00 | 0.74 | 1.63 |
