# Supplementary material for: Patterns of Cis Regulatory Variation in Diverse Human Populations
Source: PubMed Central journal article supplement (PMC3330104; doi:10.1371/journal.pgen.1002639), 2012-04-19
Supplement: pgen.1002639.s018.pdf [file pgen.1002639.s018.pdf]

Table S7. Overlap of the most significant *cis*-eQTL SNP per gene per population ('REDUCED' permutation threshold 0.01) with GWAS SNPs from NHGRI GWAS Catalog (Accessed 8/4/2011)

| SNP        | Ensembl Gene ID | population | Spearman rho <sup>a</sup> | -log <sub>10</sub> (pvalue) | SNP distance to TSS (bp) | No. pops with<br>EnsGene <i>cis</i> -<br>eQTL | Trait                                                     |
|------------|-----------------|------------|---------------------------|-----------------------------|--------------------------|-----------------------------------------------|-----------------------------------------------------------|
| rs2074518  | ENSG00000005156 | CEU        | 0.64                      | 12.9784                     | 16844                    | 4                                             | QT interval                                               |
| rs470119   | ENSG00000025708 | CEU        | 0.46                      | 6.3766                      | 1547                     | 1                                             | Hematological and biochemical traits                      |
| rs12188164 | ENSG00000063438 | CEU        | 0.54                      | 8.9449                      | 156500                   | 4                                             | Cystic fibrosis severity                                  |
| rs6537837  | ENSG00000065135 | CEU        | 0.75                      | 19.8684                     | 28431                    | 8                                             | Major depressive disorder                                 |
| rs2290400  | ENSG00000073605 | CEU        | 0.51                      | 7.6838                      | 8663                     | 8                                             | Type 1 diabetes                                           |
| rs6429082  | ENSG00000116957 | CEU        | 0.48                      | 6.9352                      | 69401                    | 7                                             | Adiposity                                                 |
| rs1169313  | ENSG00000157895 | CEU        | 0.55                      | 9.135                       | 11630                    | 8                                             | Plasma levels of liver enzymes                            |
| rs13160562 | ENSG00000164307 | CEU        | 0.78                      | 22.7639                     | 32521                    | 8                                             | Alcohol dependence                                        |
| rs12720356 | ENSG00000167807 | CEU        | 0.58                      | 10.3076                     | -43284                   | 1                                             | Crohn's disease                                           |
| rs12720356 | ENSG00000167807 | CEU        | 0.58                      | 10.3076                     | -43284                   | 1                                             | Psoriasis                                                 |
| rs694739   | ENSG00000168071 | CEU        | 0.52                      | 8.2412                      | -10462                   | 4                                             | Alopecia areata                                           |
| rs694739   | ENSG00000168071 | CEU        | 0.52                      | 8.2412                      | -10462                   | 4                                             | Crohn's disease                                           |
| rs10440635 | ENSG00000171522 | CEU        | 0.52                      | 8.0189                      | -189242                  | 4                                             | Ankylosing spondylitis                                    |
| rs11978267 | ENSG00000185811 | CEU        | 0.51                      | 7.7258                      | 118874                   | 7                                             | Acute lymphoblastic leukemia (childhood)                  |
| rs7097     | ENSG00000186184 | CEU        | 0.49                      | 7.1281                      | 2533                     | 5                                             | Large B-cell lymphoma                                     |
| rs2242330  | ENSG00000187054 | CEU        | 0.40                      | 4.8707                      | 381895                   | 1                                             | Parkinson's disease                                       |
| rs9303277  | ENSG00000073605 | CHB        | 0.53                      | 6.3094                      | 98434                    | 8                                             | Primary biliary cirrhosis                                 |
| rs968451   | ENSG00000100311 | CHB        | 0.55                      | 6.7767                      | -29861                   | 3                                             | Primary biliary cirrhosis                                 |
| rs517811   | ENSG00000104490 | CHB        | 0.50                      | 5.4929                      | 192272                   | 2                                             | Cognitive test performance                                |
| rs13385191 | ENSG00000118961 | CHB        | 0.65                      | 10.2533                     | 134609                   | 7                                             | Prostate cancer                                           |
| rs3758354  | ENSG00000135046 | CHB        | 0.57                      | 7.5415                      | -2110                    | 4                                             | Schizophrenia, bipolar disorder and depression (combined) |
| rs2736340  | ENSG00000154319 | CHB        | 0.65                      | 10.0553                     | -11746                   | 8                                             | Rheumatoid arthritis                                      |
| rs2736340  | ENSG00000154319 | CHB        | 0.65                      | 10.0553                     | -11746                   | 8                                             | Systemic lupus erythematosus                              |
| rs13160562 | ENSG00000164307 | CHB        | 0.64                      | 9.7479                      | 32521                    | 8                                             | Alcohol dependence                                        |
| rs181359   | ENSG00000185651 | CHB        | 0.75                      | 15.0731                     | 6684                     | 8                                             | Crohn's disease                                           |
| rs10781499 | ENSG00000187796 | CHB        | 0.48                      | 5.1576                      | 1728                     | 3                                             | Ulcerative colitis                                        |
| rs1008953  | ENSG00000198641 | CHB        | 0.53                      | 6.3615                      | -9851                    | 5                                             | Psoriasis                                                 |
| rs9303277  | ENSG00000073605 | GIH        | 0.65                      | 10.324                      | 98434                    | 8                                             | Primary biliary cirrhosis                                 |
| rs3825932  | ENSG00000103811 | GIH        | 0.72                      | 13.3805                     | 1974                     | 8                                             | Type 1 diabetes                                           |
| rs4580814  | ENSG00000113504 | GIH        | 0.47                      | 5.0403                      | -1094                    | 3                                             | Hematological and biochemical traits                      |
| rs13385191 | ENSG00000118961 | GIH        | 0.83                      | 21.0682                     | 134609                   | 7                                             | Prostate cancer                                           |
| rs13160562 | ENSG00000164307 | GIH        | 0.78                      | 17.43                       | 32521                    | 8                                             | Alcohol dependence                                        |
| rs6565681  | ENSG00000173821 | GIH        | 0.62                      | 9.148                       | 34768                    | 1                                             | Moyamoya disease                                          |
| rs1023252  | ENSG00000177000 | GIH        | 0.70                      | 12.3663                     | -32918                   | 6                                             | Natriuretic peptide levels                                |
| rs3091242  | ENSG00000183726 | GIH        | 0.63                      | 9.5315                      | 9976                     | 6                                             | Erythrocyte sedimentation rate                            |
| rs260461   | ENSG00000198131 | GIH        | 0.50                      | 5.6934                      | 15555                    | 4                                             | Attention deficit hyperactivity disorder                  |
| rs6537837  | ENSG00000065135 | JPT        | 0.85                      | 22.807                      | 28431                    | 8                                             | Major depressive disorder                                 |
| rs7216389  | ENSG00000073605 | JPT        | 0.68                      | 11.8324                     | 4954                     | 8                                             | Asthma                                                    |
| rs1550057  | ENSG00000109445 | JPT        | 0.54                      | 6.5002                      | -24667                   | 2                                             | Conduct disorder (case status)                            |
| rs4580814  | ENSG00000113504 | JPT        | 0.60                      | 8.4605                      | -1094                    | 3                                             | Hematological and biochemical traits                      |
| rs13385191 | ENSG00000118961 | JPT        | 0.77                      | 16.2049                     | 134609                   | 7                                             | Prostate cancer                                           |
| rs13385731 | ENSG00000119812 | JPT        | 0.52                      | 6.3516                      | 122476                   | 1                                             | Systemic lupus erythematosus                              |

| SNP        | Ensembl Gene ID | population | Spearman rho <sup>a</sup> | -log10(pvalue) | SNP distance to TSS (bp) | No. pops with<br>EnsGene cis -<br>eQTL | Trait                                                     |
|------------|-----------------|------------|---------------------------|----------------|--------------------------|----------------------------------------|-----------------------------------------------------------|
| rs3118470  | ENSG00000134453 | JPT        | 0.45                      | 4.6395         | -29294                   | 1                                      | Alopecia areata                                           |
| rs3758354  | ENSG00000135046 | JPT        | 0.53                      | 6.5974         | -2110                    | 4                                      | Schizophrenia, bipolar disorder and depression (combined) |
| rs884205   | ENSG00000141655 | JPT        | 0.49                      | 5.4204         | 62337                    | 1                                      | Bone mineral density (spine)                              |
| rs4654748  | ENSG00000142794 | JPT        | 0.64                      | 9.8485         | 19438                    | 7                                      | Folate pathway vitamin levels                             |
| rs1535     | ENSG00000149485 | JPT        | 0.50                      | 5.6697         | 61034                    | 1                                      | Metabolic syndrome                                        |
| rs1535     | ENSG00000149485 | JPT        | 0.50                      | 5.6697         | 61034                    | 1                                      | Response to statin therapy                                |
| rs1600249  | ENSG00000154319 | JPT        | 0.69                      | 12.1534        | -27411                   | 8                                      | Rheumatoid arthritis                                      |
| rs17021918 | ENSG00000163110 | JPT        | 0.49                      | 5.539          | 189839                   | 5                                      | Prostate cancer                                           |
| rs13160562 | ENSG00000164307 | JPT        | 0.58                      | 7.8472         | 32521                    | 8                                      | Alcohol dependence                                        |
| rs12338076 | ENSG00000165661 | JPT        | 0.51                      | 5.8758         | 15947                    | 5                                      | Height                                                    |
| rs7216389  | ENSG00000172057 | JPT        | 0.77                      | 16.8491        | 13905                    | 8                                      | Asthma                                                    |
| rs3091242  | ENSG00000183726 | JPT        | 0.68                      | 11.7761        | 9976                     | 6                                      | Erythrocyte sedimentation rate                            |
| rs4821112  | ENSG00000185651 | JPT        | 0.72                      | 13.4934        | 42804                    | 8                                      | Hematological and biochemical traits                      |
| rs2860580  | ENSG00000196306 | JPT        | 0.57                      | 7.6414         | 51302                    | 8                                      | Nasopharyngeal carcinoma                                  |
| rs260461   | ENSG00000198131 | JPT        | 0.58                      | 7.853          | 15555                    | 4                                      | Attention deficit hyperactivity disorder                  |
| rs3825932  | ENSG00000103811 | LWK        | 0.71                      | 13.2979        | 1974                     | 8                                      | Type 1 diabetes                                           |
| rs281379   | ENSG00000126453 | LWK        | 0.51                      | 5.9256         | -954125                  | 1                                      | Crohn's disease                                           |
| rs2273     | ENSG00000138744 | LWK        | 0.53                      | 6.4292         | -27222                   | 8                                      | Longevity                                                 |
| rs1048886  | ENSG00000154079 | LWK        | 0.58                      | 8.0156         | 12569                    | 6                                      | Type 2 diabetes                                           |
| rs2736340  | ENSG00000154319 | LWK        | 0.64                      | 10.0644        | -11746                   | 8                                      | Rheumatoid arthritis                                      |
| rs2736340  | ENSG00000154319 | LWK        | 0.64                      | 10.0644        | -11746                   | 8                                      | Systemic lupus erythematosus                              |
| rs12029454 | ENSG00000158850 | LWK        | 0.51                      | 5.9764         | -985803                  | 1                                      | QT interval                                               |
| rs13160562 | ENSG00000164307 | LWK        | 0.46                      | 4.7454         | 32521                    | 8                                      | Alcohol dependence                                        |
| rs9822268  | ENSG00000185614 | LWK        | 0.60                      | 8.3886         | -120958                  | 1                                      | Ulcerative colitis                                        |
| rs12680655 | ENSG00000066827 | MEX        | 0.64                      | 5.727          | 87944                    | 6                                      | Height                                                    |
| rs9303277  | ENSG00000073605 | MEX        | 0.59                      | 4.7249         | 98434                    | 8                                      | Primary biliary cirrhosis                                 |
| rs5751901  | ENSG00000100031 | MEX        | 0.63                      | 5.3691         | 12548                    | 5                                      | Protein quantitative trait loci                           |
| rs1260326  | ENSG00000115241 | MEX        | 0.70                      | 6.9657         | -98444                   | 3                                      | C-reactive protein                                        |
| rs1260326  | ENSG00000115241 | MEX        | 0.70                      | 6.9657         | -98444                   | 3                                      | Chronic kidney disease                                    |
| rs1260326  | ENSG00000115241 | MEX        | 0.70                      | 6.9657         | -98444                   | 3                                      | Hematological and biochemical traits                      |
| rs1260326  | ENSG00000115241 | MEX        | 0.70                      | 6.9657         | -98444                   | 3                                      | Hypertriglyceridemia                                      |
| rs1260326  | ENSG00000115241 | MEX        | 0.70                      | 6.9657         | -98444                   | 3                                      | Other metabolic traits                                    |
| rs1260326  | ENSG00000115241 | MEX        | 0.70                      | 6.9657         | -98444                   | 3                                      | Triglycerides                                             |
| rs1260326  | ENSG00000115241 | MEX        | 0.70                      | 6.9657         | -98444                   | 3                                      | Two-hour glucose challenge                                |
| rs1260326  | ENSG00000115241 | MEX        | 0.70                      | 6.9657         | -98444                   | 3                                      | Waist circumference and related phenotypes                |
| rs13385191 | ENSG00000118961 | MEX        | 0.77                      | 9.0918         | 134609                   | 7                                      | Prostate cancer                                           |
| rs4654748  | ENSG00000142794 | MEX        | 0.67                      | 6.4068         | 19438                    | 7                                      | Folate pathway vitamin levels                             |
| rs2618476  | ENSG00000154319 | MEX        | 0.82                      | 10.4371        | -20314                   | 8                                      | Systemic lupus erythematosus                              |
| rs13160562 | ENSG00000164307 | MEX        | 0.70                      | 7.1185         | 32521                    | 8                                      | Alcohol dependence                                        |
| rs255049   | ENSG00000167264 | MEX        | 0.60                      | 4.9422         | -43712                   | 1                                      | HDL cholesterol                                           |
| rs6049839  | ENSG00000185019 | MEX        | 0.60                      | 4.9054         | 621975                   | 3                                      | Systemic lupus erythematosus                              |
| rs7678436  | ENSG00000109805 | MKK        | 0.39                      | 5.5855         | -14559                   | 2                                      | Height                                                    |
| rs6918981  | ENSG00000112664 | MKK        | 0.38                      | 5.3604         | 121927                   | 2                                      | Height                                                    |
| rs13385191 | ENSG00000118961 | MKK        | 0.55                      | 11.3519        | 134609                   | 7                                      | Prostate cancer                                           |

| SNP        | Ensembl Gene ID | population | Spearman rho <sup>a</sup> | -log10(pvalue) | SNP distance to TSS (bp) | No. pops with<br>Ensembl Gene cis -<br>eQTL | Trait                                                           |
|------------|-----------------|------------|---------------------------|----------------|--------------------------|---------------------------------------------|-----------------------------------------------------------------|
| rs3758354  | ENSG00000135046 | MKK        | 0.38                      | 5.3503         | -2110                    | 4                                           | Schizophrenia, bipolar disorder and depression (combined)       |
| rs2277027  | ENSG00000135074 | MKK        | 0.44                      | 7.208          | 70392                    | 6                                           | Pulmonary function                                              |
| rs755109   | ENSG00000136932 | MKK        | 0.54                      | 10.9106        | -11351                   | 3                                           | Quantitative traits                                             |
| rs735396   | ENSG00000157895 | MKK        | 0.48                      | 8.5433         | 15456                    | 8                                           | N-glycan levels                                                 |
| rs10440635 | ENSG00000171522 | MKK        | 0.39                      | 5.5665         | -189242                  | 4                                           | Ankylosing spondylitis                                          |
| rs8049439  | ENSG00000178952 | MKK        | 0.44                      | 7.0041         | 20128                    | 5                                           | Inflammatory bowel disease (early onset)                        |
| rs7586970  | ENSG00000064989 | YRI        | 0.40                      | 4.6838         | -30482                   | 1                                           | Coronary heart disease                                          |
| rs1412444  | ENSG00000107798 | YRI        | 0.46                      | 6.2154         | 171387                   | 4                                           | Coronary heart disease                                          |
| rs3729639  | ENSG00000125122 | YRI        | 0.46                      | 6.1631         | 35400                    | 2                                           | Coronary heart disease                                          |
| rs3758354  | ENSG00000135046 | YRI        | 0.44                      | 5.4498         | -2110                    | 4                                           | Schizophrenia, bipolar disorder and depression (combined)       |
| rs2736340  | ENSG00000154319 | YRI        | 0.53                      | 8.3462         | -11746                   | 8                                           | Rheumatoid arthritis                                            |
| rs2736340  | ENSG00000154319 | YRI        | 0.53                      | 8.3462         | -11746                   | 8                                           | Systemic lupus erythematosus                                    |
| rs13160562 | ENSG00000164307 | YRI        | 0.66                      | 14.0736        | 32521                    | 8                                           | Alcohol dependence                                              |
| rs17119280 | ENSG00000172456 | YRI        | 0.53                      | 8.4766         | 36421                    | 1                                           | Response to antipsychotic therapy (extrapyramidal side effects) |
| rs8049439  | ENSG00000178952 | YRI        | 0.58                      | 10.461         | 20128                    | 5                                           | Inflammatory bowel disease (early onset)                        |

<sup>a</sup>Absolute value of Spearman's rho
