# Supplementary material for: Patterns of Cis Regulatory Variation in Diverse Human Populations
Source: PLoS Genet. 2012 Apr 19;8(4):e1002639. doi: 10.1371/journal.pgen.1002639 (PMC3330104; doi:10.1371/journal.pgen.1002639)
Supplement: Table S2 — The top 20 most differentiated Gene Ontology functions between all populations. (PDF) [file pgen.1002639.s013.pdf]

Table S2. The top 20 most differentiated Gene Ontology functions between all populations.

| GO term    | p-value    | GO term function                                                                               |
|------------|------------|------------------------------------------------------------------------------------------------|
| GO:0005634 | 5.225E-149 | nucleus                                                                                        |
| GO:0005739 | 4.3975E-91 | mitochondrion                                                                                  |
| GO:0005829 | 4.8528E-72 | cytosol                                                                                        |
| GO:0005515 | 1.3043E-66 | protein binding                                                                                |
| GO:0003723 | 6.4561E-63 | RNA binding                                                                                    |
| GO:0005737 | 9.7439E-59 | cytoplasm                                                                                      |
| GO:0000166 | 6.3562E-53 | nucleotide binding                                                                             |
| GO:0008380 | 2.6776E-51 | RNA splicing                                                                                   |
| GO:0005654 | 8.8023E-50 | nucleoplasm                                                                                    |
| GO:0003676 | 1.1003E-42 | nucleic acid binding                                                                           |
| GO:0005730 | 3.1937E-42 | nucleolus                                                                                      |
| GO:0000398 | 2.9656E-38 | nuclear mRNA splicing, via spliceosome                                                         |
| GO:0051436 | 9.1724E-38 | negative regulation of ubiquitin-protein ligase activity during mitotic cell cycle             |
| GO:0051437 | 6.0837E-37 | positive regulation of ubiquitin-protein ligase activity during mitotic cell cycle             |
| GO:0031145 | 7.0574E-37 | anaphase-promoting complex-dependent proteasomal ubiquitin-dependent protein catabolic process |
| GO:0016740 | 2.5797E-33 | transferase activity                                                                           |
| GO:0005681 | 4.2676E-33 | spliceosome                                                                                    |
| GO:0005743 | 4.9103E-33 | mitochondrial inner membrane                                                                   |
| GO:0005524 | 5.1422E-32 | ATP binding                                                                                    |
| GO:0006512 | 8.0575E-30 | ubiquitin cycle                                                                                |
