# Supplementary material for: Patterns of Cis Regulatory Variation in Diverse Human Populations
Source: PLoS Genet. 2012 Apr 19;8(4):e1002639. doi: 10.1371/journal.pgen.1002639 (PMC3330104; doi:10.1371/journal.pgen.1002639)
Supplement: Table S3 — For each population, the top 10 most differentiated Gene Ontology functions between the primary population and other populations (and not between any other populations). (PDF) [file pgen.1002639.s014.pdf]

Table S3. For each population, the top 10 most differentiated Gene Ontology functions between the primary population and other populations (and not between any other populations).

|     | GO term    | p-value  | GO term function                                         |
|-----|------------|----------|----------------------------------------------------------|
| CEU | GO:0006955 | 6.74E-06 | immune response                                          |
|     | GO:0050776 | 4.05E-05 | regulation of immune response                            |
|     | GO:0000724 | 2.04E-04 | double-strand break repair via homologous recombination  |
|     | GO:0030027 | 6.07E-04 | lamellipodium                                            |
|     | GO:0031418 | 1.17E-03 | L-ascorbic acid binding                                  |
|     | GO:0000293 | 1.40E-03 | ferric-chelate reductase activity                        |
|     | GO:0006968 | 1.78E-03 | cellular defense response                                |
|     | GO:0000226 | 2.87E-03 | microtubule cytoskeleton organization and biogenesis     |
|     | GO:0004114 | 3.40E-03 | 3',5'-cyclic-nucleotide phosphodiesterase activity       |
|     | GO:0030522 | 4.20E-03 | intracellular receptor-mediated signaling pathway        |
|     | GO:0030890 | 5.02E-03 | positive regulation of B cell proliferation              |
|     | GO:0005543 | 5.08E-03 | phospholipid binding                                     |
|     | GO:0006396 | 3.88E-06 | RNA processing                                           |
|     | GO:0016849 | 7.67E-04 | phosphorus-oxygen lyase activity                         |
| CHB | GO:0009190 | 1.24E-03 | cyclic nucleotide biosynthetic process                   |
|     | GO:0015923 | 1.76E-03 | mannosidase activity                                     |
|     | GO:0009615 | 1.92E-03 | response to virus                                        |
|     | GO:0042826 | 3.83E-03 | histone deacetylase binding                              |
|     | GO:0006306 | 3.87E-03 | DNA methylation                                          |
|     | GO:0016799 | 3.94E-03 | hydrolase activity, hydrolyzing N-glycosyl compounds     |
|     | GO:0006928 | 6.19E-03 | cell motion                                              |
|     | GO:0016018 | 8.06E-03 | cyclosporin A binding                                    |
|     | GO:0003779 | 1.35E-08 | actin binding                                            |
|     | GO:0000062 | 2.14E-06 | acyl-CoA binding                                         |
|     | GO:0015629 | 5.66E-05 | actin cytoskeleton                                       |
| GIH | GO:0046027 | 1.20E-04 | phospholipid:diacylglycerol acyltransferase activity     |
|     | GO:0055114 | 1.91E-03 | oxidation reduction                                      |
|     | GO:0005200 | 2.18E-03 | structural constituent of cytoskeleton                   |
|     | GO:0003841 | 2.30E-03 | 1-acylglycerol-3-phosphate O-acyltransferase activity    |
|     | GO:0008095 | 3.20E-03 | inositol-1,4,5-triphosphate receptor activity            |
|     | GO:0016407 | 4.27E-03 | acetyltransferase activity                               |
|     | GO:0045103 | 4.35E-03 | intermediate filament-based process                      |
|     | GO:0006520 | 2.97E-04 | amino acid metabolic process                             |
|     | GO:0006656 | 2.06E-03 | phosphatidylcholine biosynthetic process                 |
|     | GO:0015020 | 3.20E-03 | glucuronosyltransferase activity                         |
|     | GO:0030217 | 5.69E-03 | T cell differentiation                                   |
| JPT | GO:0007089 | 7.01E-03 | traversing start control point of mitotic cell cycle     |
|     | GO:0007265 | 1.19E-02 | Ras protein signal transduction                          |
|     | GO:0006406 | 1.76E-02 | mRNA export from nucleus                                 |
|     | GO:0034100 | 2.06E-02 | L-vinylglycine deaminase activity                        |
|     | GO:0046688 | 2.41E-02 | response to copper ion                                   |
|     | GO:0006312 | 2.56E-02 | mitotic recombination                                    |
|     | GO:0048496 | 3.09E-02 | maintenance of organ identity                            |
|     | GO:0046872 | 8.73E-18 | metal ion binding                                        |
|     | GO:0006355 | 2.39E-13 | regulation of transcription, DNA-dependent               |
|     | GO:0050821 | 6.85E-08 | protein stabilization                                    |
|     | GO:0016568 | 4.54E-07 | chromatin modification                                   |
| LWK | GO:0005794 | 9.49E-07 | Golgi apparatus                                          |
|     | GO:0006888 | 1.46E-06 | ER to Golgi vesicle-mediated transport                   |
|     | GO:0045786 | 1.09E-05 | negative regulation of cell cycle                        |
|     | GO:0003714 | 3.34E-05 | transcription corepressor activity                       |
|     | GO:0008624 | 5.13E-05 | induction of apoptosis by extracellular signals          |
|     | GO:0005694 | 6.49E-05 | chromosome                                               |
|     | GO:0005832 | 2.30E-09 | chaperonin-containing T-complex                          |
|     | GO:0044267 | 4.22E-09 | cellular protein metabolic process                       |
|     | GO:0006275 | 1.38E-08 | regulation of DNA replication                            |
|     | GO:0005525 | 4.60E-08 | GTP binding                                              |
|     | GO:0003684 | 1.29E-06 | damaged DNA binding                                      |
| MEX | GO:0006303 | 2.02E-06 | double-strand break repair via nonhomologous end joining |
|     | GO:0003688 | 2.57E-06 | DNA replication origin binding                           |
|     | GO:0006164 | 3.66E-06 | purine nucleotide biosynthetic process                   |
|     | GO:0004019 | 4.52E-06 | adenylosuccinate synthase activity                       |
|     | GO:0002376 | 4.52E-06 | immune system process                                    |
|     | GO:0005743 | 2.24E-41 | mitochondrial inner membrane                             |
|     | GO:0000502 | 1.07E-35 | proteasome complex                                       |
|     | GO:0006412 | 8.10E-29 | translation                                              |
|     | GO:0005840 | 4.18E-21 | ribosome                                                 |
|     | GO:0003735 | 3.30E-18 | structural constituent of ribosome                       |
|     | GO:0008168 | 1.93E-17 | methyltransferase activity                               |
| MKK | GO:0006414 | 7.99E-16 | translational elongation                                 |
|     | GO:0006368 | 1.49E-12 | RNA elongation from RNA polymerase II promoter           |
|     | GO:0004527 | 3.65E-12 | exonuclease activity                                     |
|     | GO:0005747 | 6.12E-12 | mitochondrial respiratory chain complex I                |
|     | GO:0022627 | 4.74E-08 | cytosolic small ribosomal subunit                        |
|     | GO:0004017 | 3.41E-03 | adenylate kinase activity                                |
|     | GO:0016791 | 5.21E-03 | phosphatase activity                                     |
|     | GO:0008652 | 7.10E-03 | amino acid biosynthetic process                          |
|     | GO:0004765 | 1.30E-02 | shikimate kinase activity                                |
|     | GO:0004725 | 1.39E-02 | protein tyrosine phosphatase activity                    |
|     | GO:0016311 | 1.82E-02 | dephosphorylation                                        |
| YRI | GO:0008095 | 2.04E-02 | inositol-1,4,5-triphosphate receptor activity            |
|     | GO:0042255 | 2.10E-02 | ribosome assembly                                        |
|     | GO:0006895 | 2.16E-02 | Golgi to endosome transport                              |
